# Supplementary material
Source: PubMed Central journal article supplement (PMC9760207)
Supplement: mmc1.pdf [file mmc1.pdf]

## A Appendix A: Additional tables

Table A1: Comparison of key variables with ISTAT surveys

| Variables                                     | Our sample | ISTAT |
|-----------------------------------------------|------------|-------|
| <i>Family type</i> <sup>1</sup>               |            |       |
| Couples with 1 child                          | 44.0%      | 47.9% |
| Couples with 2 children                       | 46.8%      | 41.7% |
| Couples with 3 or more children               | 9.1%       | 10.4% |
| <i>Geographical distribution</i> <sup>2</sup> |            |       |
| North                                         | 53.6%      | 46.0% |
| Center                                        | 26.7%      | 19.9% |
| South                                         | 19.7%      | 34.1% |
| <i>University degree</i> <sup>3</sup>         |            |       |
| Females                                       | 59.9%      | 29.2% |
| Males                                         | 38.8%      | 19.5% |
| <i>Working</i> <sup>3</sup>                   |            |       |
| Females                                       | 78.6%      | 62.8% |
| Males                                         | 96.0%      | 84.9% |
| <i>Foreign born</i> <sup>4</sup>              |            |       |
| Females                                       | 4.7%       | 8.9%  |
| Males                                         | 4.5%       | 8.7%  |
| <i>Parents</i> <sup>5</sup>                   |            |       |
| Mother' share of housework                    | 73.0%      | 73.3% |
| Mother' share of childcare                    | 66.8%      | 62.7% |
| <i>Children 3-5</i> <sup>5</sup>              |            |       |
| Hours of TV                                   | 1.37       | 1.25  |
| Hours of reading                              | 1.02       | 0.42  |
| <i>Children 6-10</i> <sup>5</sup>             |            |       |
| Hours of TV                                   | 1.45       | 1.57  |
| Hours of reading                              | 0.94       | 0.46  |
| <i>Children 11-14</i> <sup>5</sup>            |            |       |
| Hours of TV                                   | 1.96       | 1.72  |
| Hours of reading                              | 0.90       | 0.55  |

Notes: 1. Reference population shares are drawn from the Multipurpose Survey on Households: Aspects of Daily Life 2019. 2. Reference values are drawn from Resident Municipal Population on January 1 2019. 3. Reference values are the share of males and females aged 30-49 with a university degree, drawn from the 2019 Labour Force Survey. 4. Source Resident Population at January 1st 2020. 5. Reference values are drawn to the 2013 Italian Time Use Survey, for a sample of bi-active couples with children, with the woman in the age range 25-64. For comparative purposes, the same conditions have been applied to our samples, whose reference values reflect what was stated as the pre-lockdown situation.

Table A2: Descriptive statistics for the sample of couples with children

| Variable                                          | Before Lockdown |       | During lockdown |       |
|---------------------------------------------------|-----------------|-------|-----------------|-------|
|                                                   | Mean            | S.d.  | Mean            | S.d.  |
| Mother's share of housework                       | 0.754           | 0.188 | 0.710           | 0.195 |
| Mother's share of childcare                       | 0.689           | 0.183 | 0.667           | 0.199 |
| Father main caregiver                             | 0.281           | 0.450 | 0.348           | 0.476 |
| Total parental homework hours                     | 3.108           | 2.745 | 6.453           | 4.458 |
| Mother's work status (1 = working, 0=other)       | 0.786           | 0.410 | 0.507           | 0.500 |
| Father's work status (1 = working, 0=other)       | 0.960           | 0.197 | 0.704           | 0.457 |
| Mother's daily hours of work (inc. smart working) | 4.181           | 2.662 | 2.810           | 2.942 |
| Father's daily hours of work (inc. smart working) | 6.163           | 2.514 | 4.561           | 3.322 |
| Grandparents' hours of childcare                  | 2.210           | 2.532 | 0.790           | 2.218 |
| Babysitter's hours of childcare                   | 0.343           | 1.126 | 0.109           | 0.750 |
| Mother under strict lockdown                      | -               | -     | 0.030           | 0.171 |
| Father under strict lockdown                      | -               | -     | 0.018           | 0.132 |
| Mother switched to smart working during lockdown  | -               | -     | 0.140           | 0.347 |
| Share of family income earned by the mother       | 0.341           | 0.236 | -               | -     |
| Age of mother                                     | 41.234          | 5.736 | -               | -     |
| Age of father                                     | 43.854          | 6.360 | -               | -     |
| Age difference ratio                              | 0.515           | 0.026 | -               | -     |
| Respondent is male                                | 0.069           | 0.253 | -               | -     |
| 2 or more children in the household               | 0.554           | 0.497 | -               | -     |
| Presence of other adults in the household         | 0.118           | 0.322 | -               | -     |
| Father has a university degree                    | 0.587           | 0.493 | -               | -     |
| Mother has a university degree                    | 0.374           | 0.484 | -               | -     |
| Both parents have non-Italian nationality         | 0.015           | 0.121 | -               | -     |
| Observations                                      | 2,101           |       |                 |       |

Table A3: Descriptive statistics for the sample of children

| Variable                                        | Before Lockdown |       | During lockdown |       | Variation |       |
|-------------------------------------------------|-----------------|-------|-----------------|-------|-----------|-------|
|                                                 | Mean            | S.d.  | Mean            | S.d.  | Mean      | S.d.  |
| Emotional status <sup>1</sup>                   | -               | -     | -               | -     | -0.585    | 0.957 |
| Personal relationship <sup>1</sup>              | -               | -     | -               | -     | 0.193     | 1.019 |
| Evaluation of educational progress <sup>2</sup> | -               | -     | -               | -     | 4.778     | 2.861 |
| TV hours per day                                | 1.444           | 0.961 | 2.913           | 1.615 | 1.510     | 1.468 |
| Reading hours per day                           | 0.971           | 0.733 | 1.206           | 0.964 | 0.239     | 0.880 |
| Extracurricular activities hours per week       | 0.597           | 0.510 | 0.137           | 0.324 | -0.461    | 0.518 |
| Child is male                                   | 0.507           | 0.500 | -               | -     | -         | -     |
| Age of child                                    | 7.082           | 4.121 | -               | -     | -         | -     |
| Distance learning hours                         | 1.199           | 1.418 | -               | -     | -         | -     |
| <i>School level</i>                             |                 |       |                 |       |           |       |
| Kindergarten                                    | 0.375           | 0.484 | -               | -     | -         | -     |
| Primary                                         | 0.403           | 0.491 | -               | -     | -         | -     |
| Secondary                                       | 0.222           | 0.415 | -               | -     | -         | -     |
| Observations                                    | 3,619           |       |                 |       |           |       |

Notes: 1 In a -2 (seriously worsened) to 2 (notably improved) scale, 0 meaning no change was perceived. 2. In a 0 to 10 scale, with 0 meaning no progress at all is being made, 10 the child is progressing as if s/he was attending school.

Table A4: Full regression estimates for parents' outcomes

|                                                      | (1)                         | (2)                         | (3)                         | (4)                         | (5)                    | (6)                    |
|------------------------------------------------------|-----------------------------|-----------------------------|-----------------------------|-----------------------------|------------------------|------------------------|
|                                                      | Mother's share of housework | Mother's share of housework | Mother's share of childcare | Mother's share of childcare | Father main caregiver  | Father main caregiver  |
| Constant                                             | -0.0418***<br>(0.00525)     | 0.230<br>(0.270)            | -0.0213***<br>(0.00558)     | -0.0888<br>(0.440)          | 0.0661***<br>(0.0172)  | 0.725<br>(1.093)       |
| Father stopped working during the lockdown           | -0.0496***<br>(0.0119)      | -0.0523***<br>(0.0125)      | -0.0309**<br>(0.0139)       | -0.0408***<br>(0.0142)      | 0.140***<br>(0.0339)   | 0.169***<br>(0.0369)   |
| Mother stopped working during the lockdown           | 0.0221**<br>(0.00943)       | 0.0237**<br>(0.0103)        | 0.0362***<br>(0.0105)       | 0.0312**<br>(0.0120)        | -0.104***<br>(0.0349)  | -0.108***<br>(0.0355)  |
| Both parents stopped working during the lockdown     | -0.0153<br>(0.0159)         | -0.0207<br>(0.0170)         | -0.0523**<br>(0.0202)       | -0.0597**<br>(0.0228)       | 0.0147<br>(0.0526)     | 0.0228<br>(0.0580)     |
| Mother switched to smart working during the lockdown | 0.0169*<br>(0.00935)        | 0.00782<br>(0.00981)        | 0.0142<br>(0.0104)          | 0.0179*<br>(0.0106)         | -0.0595*<br>(0.0318)   | -0.0566*<br>(0.0324)   |
| Mother's hours of work (inc. Smart working)          | -0.00391**<br>(0.00184)     | -0.00328<br>(0.00198)       | -0.00880***<br>(0.00258)    | -0.00937***<br>(0.00275)    | 0.00803<br>(0.00560)   | 0.00745<br>(0.00597)   |
| Father's hours of work (inc. Smart working)          | 0.00403***<br>(0.00141)     | 0.00391***<br>(0.00128)     | 0.00772***<br>(0.00209)     | 0.00737***<br>(0.00194)     | -0.0125**<br>(0.00536) | -0.0112**<br>(0.00555) |
| Variation in grandparents' hours of childcare        |                             | 0.00164<br>(0.00110)        |                             | 0.000955<br>(0.00124)       |                        | -0.00311<br>(0.00330)  |
| Variation in babysitter's hours of childcare         |                             | 0.000402<br>(0.00336)       |                             | -0.00485<br>(0.00358)       |                        | 0.00971<br>(0.00903)   |
| Share of family income earned by the mother          |                             | 0.0605***<br>(0.0120)       |                             | 0.0433**<br>(0.0209)        |                        | -0.121**<br>(0.0474)   |
| Age of mother                                        |                             | -0.00345<br>(0.00310)       |                             | -0.000383<br>(0.00459)      |                        | -0.00653<br>(0.0120)   |
| Age of father                                        |                             | 0.00362<br>(0.00290)        |                             | 0.000857<br>(0.00458)       |                        | 0.00275<br>(0.0117)    |
| Age difference ratio                                 |                             | -0.531<br>(0.508)           |                             | 0.0522<br>(0.881)           |                        | -1.103<br>(2.169)      |
| Respondent is male                                   |                             | -0.0240*<br>(0.0135)        |                             | 0.00531<br>(0.0236)         |                        | -0.0175<br>(0.0484)    |
| 2 or more children in the household                  |                             | -0.0185**<br>(0.00878)      |                             | 0.00426<br>(0.00898)        |                        | 0.0131<br>(0.0267)     |
| Presence of other adults in the household            |                             | -0.0138<br>(0.00854)        |                             | -0.0180<br>(0.0144)         |                        | 0.0825**<br>(0.0380)   |
| Only father has a university degree                  |                             | -0.00917<br>(0.0173)        |                             | -0.0229<br>(0.0150)         |                        | 0.0438<br>(0.0469)     |
| Only mother has a university degree                  |                             | 0.00297<br>(0.00799)        |                             | -0.0218**<br>(0.0108)       |                        | 0.0375<br>(0.0257)     |
| Both parents have a university degree                |                             | -0.00514<br>(0.00948)       |                             | -0.0375***<br>(0.0107)      |                        | 0.0815***<br>(0.0283)  |
| Both parents have non-Italian nationality            |                             | -0.0219<br>(0.0202)         |                             | 0.0652***<br>(0.0247)       |                        | -0.156**<br>(0.0764)   |
| Province FE                                          | -                           | Yes                         | -                           | Yes                         | -                      | Yes                    |
| Day of week FE                                       | -                           | Yes                         | -                           | Yes                         | -                      | Yes                    |
| Observations                                         | 2,098                       | 1,930                       | 2,067                       | 1,910                       | 2,067                  | 1,910                  |
| R-squared                                            | 0.059                       | 0.139                       | 0.084                       | 0.155                       | 0.047                  | 0.111                  |

\*\*\*  $p < 0.01$ , \*\*  $p < 0.05$ , \*  $p < 0.1$  ; Robust standard errors in brackets (clustered at province level)

Table A5: Full regression estimates for children's emotional status

| Emotional status                           | (1)<br>OLS              | (2)<br>OLS             | (3)<br>Female resp.    | (4)<br>Weight           | (5)<br>Cont. Var.      | (6)<br>Ologit <sup>1</sup> |
|--------------------------------------------|-------------------------|------------------------|------------------------|-------------------------|------------------------|----------------------------|
| Constant                                   | -0.553***<br>(0.0325)   | -0.850***<br>(0.157)   | -0.879***<br>(0.170)   | -0.849***<br>(0.237)    | -0.826***<br>(0.159)   |                            |
| Father main caregiver                      | 0.158***<br>(0.0415)    | 0.154***<br>(0.0469)   | 0.160***<br>(0.0492)   | 0.124**<br>(0.0557)     |                        | 0.345***<br>(0.0966)       |
| Variation in father's share of childcare   |                         |                        |                        |                         | 0.321**<br>(0.146)     |                            |
| Total parental homework hours              | -0.0241***<br>(0.00659) | -0.0177**<br>(0.00780) | -0.0168**<br>(0.00814) | -0.0266***<br>(0.00925) | -0.0163**<br>(0.00775) | -0.0425***<br>(0.0163)     |
| Mother's share of housework                | -0.00848<br>(0.149)     | -0.00898<br>(0.161)    | -0.0186<br>(0.173)     | -0.0116<br>(0.211)      | 0.0561<br>(0.170)      | -0.0537<br>(0.335)         |
| Child is male                              |                         | -0.0483<br>(0.0356)    | -0.0493<br>(0.0374)    | 0.0190<br>(0.0520)      | -0.0470<br>(0.0357)    | -0.116<br>(0.0744)         |
| Age of child                               |                         | -0.0130<br>(0.0109)    | -0.0121<br>(0.0117)    | -0.00546<br>(0.0144)    | -0.0123<br>(0.0109)    | -0.0356<br>(0.0230)        |
| Distance learning hours # kindergarten     |                         | 0.0718<br>(0.0640)     | 0.0630<br>(0.0667)     | 0.101<br>(0.0822)       | 0.0746<br>(0.0640)     | 0.125<br>(0.132)           |
| Distance learning hours # Primary school   |                         | 0.176***<br>(0.0517)   | 0.167***<br>(0.0541)   | 0.136**<br>(0.0683)     | 0.166***<br>(0.0519)   | 0.375***<br>(0.112)        |
| Distance learning hours # Secondary school |                         | 0.365***<br>(0.0886)   | 0.378***<br>(0.0950)   | 0.269**<br>(0.122)      | 0.355***<br>(0.0885)   | 0.813***<br>(0.191)        |
| Hours of extra curricular activities       |                         | 0.304***<br>(0.0463)   | 0.317***<br>(0.0495)   | 0.269***<br>(0.0655)    | 0.303***<br>(0.0466)   | 0.584***<br>(0.0914)       |
| 2 children in the household                |                         | 0.0837*<br>(0.0476)    | 0.101**<br>(0.0501)    | 0.0545<br>(0.0596)      | 0.0823*<br>(0.0477)    | 0.216**<br>(0.0990)        |
| 3 children in the household                |                         | 0.217***<br>(0.0707)   | 0.236***<br>(0.0741)   | 0.165*<br>(0.0930)      | 0.200***<br>(0.0704)   | 0.582***<br>(0.151)        |
| 4 children in the household                |                         | 0.555**<br>(0.227)     | 0.574**<br>(0.233)     | 0.723***<br>(0.188)     | 0.572**<br>(0.238)     | 1.354***<br>(0.491)        |
| More than 4 children in the household      |                         | 1.022***<br>(0.393)    | 1.012**<br>(0.394)     | 0.963***<br>(0.293)     | 0.957**<br>(0.397)     | 2.184***<br>(0.548)        |
| At least one parent is not Italian         |                         | 0.174***<br>(0.0643)   | 0.175***<br>(0.0678)   | 0.230***<br>(0.0752)    | 0.175***<br>(0.0644)   | 0.411***<br>(0.120)        |
| Mother university x Father university      |                         |                        |                        |                         |                        |                            |
| No, Yes                                    |                         | 0.107<br>(0.0899)      | 0.0557<br>(0.0945)     | 0.149<br>(0.126)        | 0.101<br>(0.0899)      | 0.254<br>(0.192)           |
| Yes, No                                    |                         | 0.171***<br>(0.0529)   | 0.153***<br>(0.0548)   | 0.118**<br>(0.0589)     | 0.176***<br>(0.0533)   | 0.402***<br>(0.113)        |
| Yes, Yes                                   |                         | 0.195***<br>(0.0557)   | 0.190***<br>(0.0589)   | 0.222***<br>(0.0645)    | 0.202***<br>(0.0558)   | 0.410***<br>(0.118)        |
| Mother stop working x Father stop working  |                         |                        |                        |                         |                        |                            |
| No, Yes                                    |                         | -0.0642<br>(0.0658)    | -0.0865<br>(0.0664)    | -0.129*<br>(0.0708)     | -0.0632<br>(0.0667)    | -0.207<br>(0.144)          |
| Yes, No                                    |                         | 0.000288<br>(0.0608)   | 0.00219<br>(0.0644)    | -0.0466<br>(0.0731)     | -0.00360<br>(0.0602)   | -0.0114<br>(0.131)         |
| Yes, Yes                                   |                         | -0.0785<br>(0.0723)    | -0.0798<br>(0.0780)    | -0.0882<br>(0.0954)     | -0.0851<br>(0.0736)    | -0.135<br>(0.146)          |
| Mother switched to smart working           |                         | -0.135**<br>(0.0587)   | -0.122**<br>(0.0620)   | -0.207***<br>(0.0775)   | -0.136**<br>(0.0589)   | -0.332***<br>(0.128)       |
| Both parents under strict lockdown         |                         | 0.594***<br>(0.216)    | 0.656***<br>(0.222)    | 0.795**<br>(0.384)      | 0.631***<br>(0.219)    | 1.097**<br>(0.460)         |
| Survey respondent is male                  |                         | -0.0166<br>(0.0749)    |                        | 0.00831<br>(0.106)      | 0.0245<br>(0.0735)     | 0.0937<br>(0.151)          |
| Date of interview                          |                         | -0.102***<br>(0.0320)  | -0.0931***<br>(0.0354) | -0.0855**<br>(0.0399)   | -0.109***<br>(0.0319)  | -0.210***<br>(0.0651)      |
| Province FE                                | -                       | Yes                    | Yes                    | Yes                     | Yes                    | Yes                        |
| Day of week FE                             | -                       | Yes                    | Yes                    | Yes                     | Yes                    | Yes                        |
| Observations                               | 3,359                   | 2,640                  | 2,465                  | 2,625                   | 2,638                  | 2,688                      |
| R-squared <sup>2</sup>                     | 0.011                   | 0.134                  | 0.134                  | 0.179                   | 0.132                  | 0.0583                     |

\*\*\*  $p < 0.01$ , \*\*  $p < 0.05$ , \*  $p < 0.1$  ; Robust standard errors in brackets (clustered at household level)

Notes: 1. The constant is not reported for ordered logit estimation as it is separate for each level of the dependent variable. For the same reason, for each explanatory variable the table reports the coefficient, not the marginal effects.

2. For ordered logit estimation, the pseudo R-squared is reported.

Table A6: Full regression estimates for parent-child relationship

| Personal relationship                      | (1)<br>OLS           | (2)<br>OLS            | (3)<br>Female resp.   | (4)<br>Weight         | (5)<br>Cont. Var.     | (6)<br>Ologit <sup>1</sup> |
|--------------------------------------------|----------------------|-----------------------|-----------------------|-----------------------|-----------------------|----------------------------|
| Constant                                   | 0.130***<br>(0.0334) | 0.149<br>(0.182)      | 0.166<br>(0.195)      | 0.178<br>(0.247)      | 0.176<br>(0.182)      |                            |
| Father main caregiver                      | 0.178***<br>(0.0452) | 0.124**<br>(0.0534)   | 0.114**<br>(0.0561)   | 0.175***<br>(0.0634)  |                       | 0.260***<br>(0.101)        |
| Variation in father's share of childcare   |                      |                       |                       |                       | -0.0727<br>(0.166)    |                            |
| Total parental homework hours              | 0.00179<br>(0.00687) | 0.00950<br>(0.00809)  | 0.00762<br>(0.00847)  | -0.000420<br>(0.0103) | 0.0118<br>(0.00806)   | 0.0165<br>(0.0151)         |
| Mother's share of housework                | 0.0544<br>(0.162)    | -0.141<br>(0.183)     | -0.0230<br>(0.190)    | 0.0550<br>(0.229)     | -0.174<br>(0.192)     | -0.340<br>(0.357)          |
| Child is male                              |                      | -0.131***<br>(0.0390) | -0.137***<br>(0.0409) | -0.0993*<br>(0.0566)  | -0.131***<br>(0.0391) | -0.253***<br>(0.0739)      |
| Age of child                               |                      | -0.0181<br>(0.0122)   | -0.0183<br>(0.0132)   | -0.0306*<br>(0.0165)  | -0.0177<br>(0.0122)   | -0.0386*<br>(0.0227)       |
| Distance learning hours # kindergarden     |                      | 0.0339<br>(0.0680)    | 0.0229<br>(0.0705)    | -0.00886<br>(0.0898)  | 0.0304<br>(0.0681)    | 0.116<br>(0.130)           |
| Distance learning hours # Primary school   |                      | 0.106*<br>(0.0596)    | 0.0998<br>(0.0630)    | 0.112<br>(0.0753)     | 0.103*<br>(0.0595)    | 0.239**<br>(0.114)         |
| Distance learning hours # Secondary school |                      | 0.323***<br>(0.104)   | 0.329***<br>(0.112)   | 0.311**<br>(0.138)    | 0.321***<br>(0.104)   | 0.675***<br>(0.196)        |
| Hours of extra curricular activities       |                      | 0.151***<br>(0.0528)  | 0.142**<br>(0.0558)   | 0.103<br>(0.0712)     | 0.158***<br>(0.0527)  | 0.218***<br>(0.0842)       |
| 2 children in the household                |                      | -0.0978*<br>(0.0547)  | -0.107*<br>(0.0569)   | -0.135**<br>(0.0682)  | -0.104*<br>(0.0548)   | -0.149<br>(0.103)          |
| 3 children in the household                |                      | -0.0610<br>(0.0777)   | -0.0599<br>(0.0818)   | -0.132<br>(0.0920)    | -0.0843<br>(0.0769)   | -0.0595<br>(0.144)         |
| 4 children in the household                |                      | 0.198<br>(0.214)      | 0.173<br>(0.214)      | 0.361<br>(0.309)      | 0.196<br>(0.213)      | 0.336<br>(0.421)           |
| More than 4 children in the household      |                      | 0.346<br>(0.406)      | 0.331<br>(0.408)      | 0.366<br>(0.298)      | 0.318<br>(0.404)      | 0.732<br>(0.617)           |
| At least one parent is not Italian         |                      | 0.147**<br>(0.0703)   | 0.149**<br>(0.0739)   | 0.150*<br>(0.0769)    | 0.139**<br>(0.0706)   | 0.258*<br>(0.135)          |
| Mother university x Father university      |                      |                       |                       |                       |                       |                            |
| No, Yes                                    |                      | 0.0811<br>(0.105)     | 0.107<br>(0.112)      | 0.103<br>(0.129)      | 0.0789<br>(0.105)     | 0.143<br>(0.201)           |
| Yes, No                                    |                      | 0.0896<br>(0.0635)    | 0.104<br>(0.0656)     | 0.0615<br>(0.0660)    | 0.0986<br>(0.0639)    | 0.174<br>(0.119)           |
| Yes, Yes                                   |                      | 0.128**<br>(0.0615)   | 0.148**<br>(0.0642)   | 0.133*<br>(0.0748)    | 0.146**<br>(0.0614)   | 0.253**<br>(0.115)         |
| Mother stop working x Father stop working  |                      |                       |                       |                       |                       |                            |
| No, Yes                                    |                      | -0.118*<br>(0.0709)   | -0.130*<br>(0.0725)   | -0.0250<br>(0.0855)   | -0.0983<br>(0.0711)   | -0.248*<br>(0.135)         |
| Yes, No                                    |                      | 0.0776<br>(0.0692)    | 0.0869<br>(0.0725)    | 0.195**<br>(0.0853)   | 0.0560<br>(0.0702)    | 0.122<br>(0.129)           |
| Yes, Yes                                   |                      | -0.0108<br>(0.0931)   | -0.00458<br>(0.100)   | 0.0841<br>(0.115)     | -0.00568<br>(0.0935)  | -0.103<br>(0.173)          |
| Mother switched to smart working           |                      | -0.0627<br>(0.0693)   | -0.0735<br>(0.0732)   | -0.0777<br>(0.0839)   | -0.0609<br>(0.0692)   | -0.121<br>(0.134)          |
| Both parents under strict lockdown         |                      | 1.031***<br>(0.186)   | 1.127***<br>(0.165)   | 1.071***<br>(0.356)   | 1.043***<br>(0.184)   | 2.052***<br>(0.401)        |
| Survey respondent is male                  |                      | -0.0172<br>(0.0862)   |                       | 0.135<br>(0.138)      | 0.0145<br>(0.0865)    | -0.00603<br>(0.160)        |
| Date of interview                          |                      | -0.110***<br>(0.0334) | -0.115***<br>(0.0362) | -0.102**<br>(0.0464)  | -0.114***<br>(0.0334) | -0.222***<br>(0.0618)      |
| Province FE                                | -                    | Yes                   | Yes                   | Yes                   | Yes                   | Yes                        |
| Day of week FE                             | -                    | Yes                   | Yes                   | Yes                   | Yes                   | Yes                        |
| Observations                               | 3,375                | 2,648                 | 2,473                 | 2,633                 | 2,646                 | 2,696                      |
| R-squared <sup>2</sup>                     | 0.007                | 0.089                 | 0.092                 | 0.129                 | 0.086                 | 0.0339                     |

\*\*\*  $p < 0.01$ , \*\*  $p < 0.05$ , \*  $p < 0.1$  ; Robust standard errors in brackets (clustered at household level)

Notes: 1. The constant is not reported for ordered logit estimation as it is separate for each level of the dependent variable. For the same reason, for each explanatory variable the table reports the coefficient, not the marginal effects.

2. For ordered logit estimation, the pseudo R-squared is reported.

Table A7: Full regression estimates for children's hours of TV

| Hours of TV                                | (1)<br>OLS           | (2)<br>OLS            | (3)<br>Female resp.   | (4)<br>Weight         | (5)<br>Cont. Var.     | (6)<br>Ologit <sup>1</sup> |
|--------------------------------------------|----------------------|-----------------------|-----------------------|-----------------------|-----------------------|----------------------------|
| Constant                                   | 1.492***<br>(0.0518) | 1.907***<br>(0.258)   | 1.931***<br>(0.269)   | 2.256***<br>(0.464)   | 1.887***<br>(0.258)   |                            |
| Father main caregiver                      | -0.156**<br>(0.0652) | -0.147*<br>(0.0753)   | -0.132*<br>(0.0782)   | 0.00156<br>(0.105)    |                       | -0.220**<br>(0.0968)       |
| Variation in father's share of childcare   |                      |                       |                       |                       | -0.428*<br>(0.220)    |                            |
| Total parental homework hours              | 0.0256**<br>(0.0101) | 0.0216*<br>(0.0126)   | 0.0182<br>(0.0131)    | 0.00379<br>(0.0195)   | 0.0209*<br>(0.0125)   | 0.0388**<br>(0.0161)       |
| Mother's share of housework                | 0.455*<br>(0.252)    | 0.633**<br>(0.297)    | 0.636**<br>(0.311)    | 0.784<br>(0.502)      | 0.533*<br>(0.306)     | 0.764**<br>(0.359)         |
| Child is male                              |                      | 0.0242<br>(0.0611)    | 0.0274<br>(0.0633)    | -0.0302<br>(0.0916)   | 0.0223<br>(0.0611)    | 0.140*<br>(0.0783)         |
| Age of child                               |                      | -0.0134<br>(0.0186)   | -0.0181<br>(0.0195)   | -0.0654**<br>(0.0305) | -0.0137<br>(0.0186)   | 0.0112<br>(0.0225)         |
| Distance learning hours # kindergarden     |                      | -0.128<br>(0.101)     | -0.142<br>(0.104)     | -0.365**<br>(0.144)   | -0.133<br>(0.100)     | -0.173<br>(0.128)          |
| Distance learning hours # Primary school   |                      | 0.146*<br>(0.0883)    | 0.152*<br>(0.0907)    | 0.181<br>(0.136)      | 0.155*<br>(0.0883)    | 0.163<br>(0.110)           |
| Distance learning hours # Secondary school |                      | 0.0621<br>(0.160)     | 0.0398<br>(0.167)     | 0.225<br>(0.275)      | 0.0726<br>(0.160)     | 0.0262<br>(0.200)          |
| Hours of extra curricular activities       |                      | -0.400***<br>(0.0830) | -0.432***<br>(0.0867) | -0.434***<br>(0.129)  | -0.395***<br>(0.0832) | -0.518***<br>(0.0968)      |
| 2 children in the household                |                      | -0.0477<br>(0.0847)   | -0.0547<br>(0.0875)   | 0.00963<br>(0.125)    | -0.0480<br>(0.0848)   | -0.111<br>(0.104)          |
| 3 children in the household                |                      | -0.124<br>(0.118)     | -0.117<br>(0.124)     | -0.0645<br>(0.162)    | -0.115<br>(0.118)     | -0.256*<br>(0.149)         |
| 4 children in the household                |                      | 0.249<br>(0.277)      | 0.242<br>(0.276)      | 0.370<br>(0.338)      | 0.241<br>(0.274)      | 0.320<br>(0.425)           |
| More than 4 children in the household      |                      | 0.520<br>(0.671)      | 0.608<br>(0.642)      | 0.536<br>(0.760)      | 0.590<br>(0.682)      | 0.912<br>(0.770)           |
| At least one parent is not Italian         |                      | 0.0370<br>(0.121)     | 0.0327<br>(0.127)     | 0.148<br>(0.134)      | 0.0337<br>(0.121)     | 0.0803<br>(0.158)          |
| Mother university x Father university      |                      |                       |                       |                       |                       |                            |
| No, Yes                                    |                      | -0.0358<br>(0.168)    | 0.0350<br>(0.170)     | 0.153<br>(0.157)      | -0.0352<br>(0.167)    | -0.0487<br>(0.208)         |
| Yes, No                                    |                      | -0.0323<br>(0.0949)   | -0.0274<br>(0.0973)   | 0.0159<br>(0.114)     | -0.0398<br>(0.0954)   | -0.0930<br>(0.125)         |
| Yes, Yes                                   |                      | -0.208**<br>(0.0909)  | -0.198**<br>(0.0938)  | -0.228**<br>(0.112)   | -0.213**<br>(0.0921)  | -0.337***<br>(0.117)       |
| Mother stop working x Father stop working  |                      |                       |                       |                       |                       |                            |
| No, Yes                                    |                      | 0.102<br>(0.117)      | 0.117<br>(0.119)      | 0.152<br>(0.153)      | 0.108<br>(0.119)      | 0.220<br>(0.149)           |
| Yes, No                                    |                      | -0.107<br>(0.0979)    | -0.0882<br>(0.102)    | 0.119<br>(0.162)      | -0.111<br>(0.0981)    | -0.0976<br>(0.121)         |
| Yes, Yes                                   |                      | 0.206<br>(0.127)      | 0.247*<br>(0.131)     | 0.296*<br>(0.163)     | 0.216*<br>(0.127)     | 0.249<br>(0.164)           |
| Mother switched to smart working           |                      | -0.0556<br>(0.111)    | -0.0852<br>(0.115)    | 0.194<br>(0.174)      | -0.0532<br>(0.111)    | -0.0619<br>(0.144)         |
| Both parents under strict lockdown         |                      | -0.0461<br>(0.296)    | 0.0164<br>(0.310)     | 0.688<br>(0.536)      | -0.0870<br>(0.298)    | -0.396<br>(0.349)          |
| Survey respondent is male                  |                      | -0.171<br>(0.162)     |                       | -0.280<br>(0.221)     | -0.212<br>(0.164)     | -0.211<br>(0.177)          |
| Date of interview                          |                      | 0.121**<br>(0.0610)   | 0.0953<br>(0.0641)    | 0.126<br>(0.0981)     | 0.128**<br>(0.0599)   | 0.129*<br>(0.0734)         |
| Province FE                                | -                    | Yes                   | Yes                   | Yes                   | Yes                   | Yes                        |
| Day of week FE                             | -                    | Yes                   | Yes                   | Yes                   | Yes                   | Yes                        |
| Observations                               | 3,140                | 2,470                 | 2,333                 | 2,455                 | 2,468                 | 2,511                      |
| R-squared <sup>2</sup>                     | 0.007                | 0.094                 | 0.096                 | 0.127                 | 0.094                 | 0.0326                     |

\*\*\*  $p < 0.01$ , \*\*  $p < 0.05$ , \*  $p < 0.1$  ; Robust standard errors in brackets (clustered at household level)

Notes: 1. The constant is not reported for ordered logit estimation as it is separate for each level of the dependent variable. For the same reason, for each explanatory variable the table reports the coefficient, not the marginal effects.

2. For ordered logit estimation, the pseudo R-squared is reported.

Table A8: Full regression estimates for children's reading hours

|                                            | (1)                    | (2)                  | (3)                   | (4)                  | (5)                  | (6)                  |
|--------------------------------------------|------------------------|----------------------|-----------------------|----------------------|----------------------|----------------------|
| Reading hours                              | OLS                    | OLS                  | Female resp.          | Weight               | Cont. Var.           | Ologit <sup>1</sup>  |
| Constant                                   | 0.152***<br>(0.0311)   | 0.244<br>(0.152)     | 0.258<br>(0.160)      | 0.317<br>(0.215)     | 0.242<br>(0.152)     |                      |
| Father main caregiver                      | 0.0273<br>(0.0373)     | -0.0166<br>(0.0464)  | -0.0350<br>(0.0474)   | 0.0239<br>(0.0549)   |                      | -0.0910<br>(0.112)   |
| Variation in father's share of childcare   |                        |                      |                       |                      | -0.0538<br>(0.140)   |                      |
| Total parental homework hours              | 0.0240***<br>(0.00649) | 0.00970<br>(0.00795) | 0.0108<br>(0.00838)   | 0.0173<br>(0.0107)   | 0.00964<br>(0.00790) | 0.0257<br>(0.0189)   |
| Mother's share of housework                | 0.119<br>(0.171)       | -0.00953<br>(0.203)  | -0.0169<br>(0.210)    | 0.122<br>(0.218)     | -0.0201<br>(0.204)   | 0.103<br>(0.381)     |
| Child is male                              |                        | -0.0423<br>(0.0367)  | -0.0402<br>(0.0383)   | -0.0699<br>(0.0487)  | -0.0425<br>(0.0368)  | -0.174**<br>(0.0853) |
| Age of child                               |                        | -0.00978<br>(0.0111) | -0.0129<br>(0.0117)   | -0.0203<br>(0.0147)  | -0.00985<br>(0.0112) | -0.0491*<br>(0.0271) |
| Distance learning hours # kindergarden     |                        | 0.00286<br>(0.0633)  | -0.0229<br>(0.0651)   | 0.136<br>(0.0968)    | 0.00208<br>(0.0634)  | -0.0705<br>(0.153)   |
| Distance learning hours # Primary school   |                        | -0.0286<br>(0.0505)  | -0.0265<br>(0.0528)   | 0.0656<br>(0.0770)   | -0.0273<br>(0.0505)  | -0.00522<br>(0.128)  |
| Distance learning hours # Secondary school |                        | -0.0798<br>(0.0987)  | -0.0569<br>(0.106)    | 0.00707<br>(0.147)   | -0.0782<br>(0.0992)  | -0.0360<br>(0.233)   |
| Hours of extra curricular activities       |                        | 0.0649<br>(0.0443)   | 0.101**<br>(0.0468)   | 0.0765<br>(0.0684)   | 0.0657<br>(0.0444)   | 0.0715<br>(0.0986)   |
| 2 children in the household                |                        | -0.0467<br>(0.0471)  | -0.0540<br>(0.0482)   | -0.0677<br>(0.0598)  | -0.0471<br>(0.0471)  | -0.165<br>(0.112)    |
| 3 children in the household                |                        | -0.0697<br>(0.0625)  | -0.0881<br>(0.0649)   | -0.00170<br>(0.0797) | -0.0690<br>(0.0620)  | -0.244<br>(0.162)    |
| 4 children in the household                |                        | -0.176<br>(0.144)    | -0.195<br>(0.141)     | -0.189<br>(0.164)    | -0.178<br>(0.143)    | -0.716**<br>(0.297)  |
| More than 4 children in the household      |                        | 0.273<br>(0.249)     | 0.264<br>(0.252)      | 0.450**<br>(0.224)   | 0.281<br>(0.250)     | 0.478<br>(0.551)     |
| At least one parent is not Italian         |                        | 0.118<br>(0.0724)    | 0.121<br>(0.0746)     | 0.0169<br>(0.0686)   | 0.117<br>(0.0729)    | 0.151<br>(0.154)     |
| Mother university x Father university      |                        |                      |                       |                      |                      |                      |
| No, Yes                                    |                        | -0.118<br>(0.147)    | -0.114<br>(0.158)     | -0.200*<br>(0.119)   | -0.118<br>(0.147)    | -0.0348<br>(0.270)   |
| Yes, No                                    |                        | 0.0840<br>(0.0525)   | 0.0878<br>(0.0538)    | 0.111*<br>(0.0566)   | 0.0833<br>(0.0526)   | 0.190<br>(0.130)     |
| Yes, Yes                                   |                        | 0.186***<br>(0.0540) | 0.189***<br>(0.0556)  | 0.200***<br>(0.0699) | 0.186***<br>(0.0543) | 0.470***<br>(0.130)  |
| Mother stop working x Father stop working  |                        |                      |                       |                      |                      |                      |
| No, Yes                                    |                        | -0.0188<br>(0.0582)  | -0.0150<br>(0.0592)   | 0.0328<br>(0.0750)   | -0.0176<br>(0.0589)  | -0.0557<br>(0.146)   |
| Yes, No                                    |                        | -0.0399<br>(0.0586)  | -0.0478<br>(0.0628)   | 0.0867<br>(0.0757)   | -0.0405<br>(0.0585)  | -0.108<br>(0.134)    |
| Yes, Yes                                   |                        | -0.0544<br>(0.0744)  | -0.0428<br>(0.0783)   | -0.00524<br>(0.0859) | -0.0531<br>(0.0747)  | -0.241<br>(0.177)    |
| Mother switched to smart working           |                        | -0.0182<br>(0.0627)  | -0.0415<br>(0.0650)   | -0.0597<br>(0.0928)  | -0.0178<br>(0.0630)  | 0.00436<br>(0.156)   |
| Both parents under strict lockdown         |                        | 0.646**<br>(0.275)   | 0.691**<br>(0.287)    | 0.116<br>(0.366)     | 0.641**<br>(0.275)   | 1.149**<br>(0.510)   |
| Survey respondent is male                  |                        | 0.0467<br>(0.0811)   |                       | 0.0700<br>(0.0828)   | 0.0427<br>(0.0795)   | 0.0856<br>(0.181)    |
| Date of interview                          |                        | -0.0629*<br>(0.0342) | -0.0889**<br>(0.0369) | -0.0166<br>(0.0459)  | -0.0620*<br>(0.0342) | -0.144*<br>(0.0798)  |
| Province FE                                | -                      | Yes                  | Yes                   | Yes                  | Yes                  | Yes                  |
| Day of week FE                             | -                      | Yes                  | Yes                   | Yes                  | Yes                  | Yes                  |
| Observations                               | 3,107                  | 2,441                | 2,306                 | 2,426                | 2,439                | 2,482                |
| R-squared <sup>2</sup>                     | 0.008                  | 0.083                | 0.088                 | 0.124                | 0.083                | 0.0388               |

\*\*\*  $p < 0.01$ , \*\*  $p < 0.05$ , \*  $p < 0.1$  ; Robust standard errors in brackets (clustered at household level)

Notes: 1. The constant is not reported for ordered logit estimation as it is separate for each level of the dependent variable. For the same reason, for each explanatory variable the table reports the coefficient, not the marginal effects.  
2. For ordered logit estimation, the pseudo R-squared is reported.

Table A9: Full regression estimates for children's educational progress

| Educational progress                       | (1)<br>OLS            | (2)<br>OLS             | (3)<br>Female resp.    | (4)<br>Weight         | (5)<br>Cont. Var.      | (6)<br>Ologit <sup>1</sup> |
|--------------------------------------------|-----------------------|------------------------|------------------------|-----------------------|------------------------|----------------------------|
| Constant                                   | -4.787***<br>(0.0952) | -8.786***<br>(0.453)   | -8.919***<br>(0.464)   | -8.416***<br>(0.698)  | -8.774***<br>(0.454)   |                            |
| Father main caregiver                      | 0.000515<br>(0.134)   | 0.195<br>(0.127)       | 0.203<br>(0.132)       | 0.360**<br>(0.180)    |                        | 0.137<br>(0.0976)          |
| Variation in father's share of childcare   |                       |                        |                        |                       | 0.251<br>(0.378)       |                            |
| Total parental homework hours              | -0.126***<br>(0.0198) | -0.0566***<br>(0.0186) | -0.0629***<br>(0.0191) | -0.0709**<br>(0.0295) | -0.0542***<br>(0.0185) | -0.0412***<br>(0.0142)     |
| Mother's share of housework                | 0.176<br>(0.472)      | 0.301<br>(0.440)       | 0.206<br>(0.460)       | 0.0923<br>(0.656)     | 0.256<br>(0.452)       | 0.197<br>(0.344)           |
| Child is male                              |                       | -0.248***<br>(0.0963)  | -0.243**<br>(0.0997)   | -0.338**<br>(0.144)   | -0.244**<br>(0.0965)   | -0.204***<br>(0.0724)      |
| Age of child                               |                       | 0.230***<br>(0.0295)   | 0.232***<br>(0.0318)   | 0.213***<br>(0.0469)  | 0.234***<br>(0.0294)   | 0.173***<br>(0.0221)       |
| Distance learning hours # kindergarden     |                       | 1.735***<br>(0.190)    | 1.669***<br>(0.195)    | 1.672***<br>(0.260)   | 1.741***<br>(0.190)    | 1.348***<br>(0.142)        |
| Distance learning hours # Primary school   |                       | 2.465***<br>(0.160)    | 2.452***<br>(0.169)    | 2.195***<br>(0.249)   | 2.440***<br>(0.160)    | 1.842***<br>(0.126)        |
| Distance learning hours # Secondary school |                       | 1.806***<br>(0.259)    | 1.817***<br>(0.281)    | 1.721***<br>(0.441)   | 1.771***<br>(0.259)    | 1.309***<br>(0.190)        |
| Hours of extra curricular activities       |                       | 0.258**<br>(0.118)     | 0.330***<br>(0.123)    | 0.0945<br>(0.188)     | 0.256**<br>(0.119)     | 0.0901<br>(0.0790)         |
| 2 children in the household                |                       | 0.113<br>(0.132)       | 0.114<br>(0.137)       | 0.227<br>(0.179)      | 0.118<br>(0.132)       | 0.0801<br>(0.0991)         |
| 3 children in the household                |                       | 0.529***<br>(0.187)    | 0.522***<br>(0.193)    | 0.492*<br>(0.252)     | 0.512***<br>(0.186)    | 0.362***<br>(0.137)        |
| 4 children in the household                |                       | -0.419<br>(0.400)      | -0.407<br>(0.393)      | -0.479<br>(0.403)     | -0.393<br>(0.417)      | -0.324<br>(0.334)          |
| More than 4 children in the household      |                       | -0.236<br>(0.712)      | -0.172<br>(0.701)      | 0.475<br>(0.959)      | -0.300<br>(0.723)      | -0.213<br>(0.636)          |
| At least one parent is not Italian         |                       | 0.243<br>(0.191)       | 0.288<br>(0.197)       | 0.0959<br>(0.197)     | 0.243<br>(0.191)       | 0.169<br>(0.145)           |
| Mother university x Father university      |                       |                        |                        |                       |                        |                            |
| No, Yes                                    |                       | 0.582**<br>(0.253)     | 0.613**<br>(0.266)     | 0.622**<br>(0.292)    | 0.574**<br>(0.251)     | 0.380*<br>(0.199)          |
| Yes, No                                    |                       | 0.166<br>(0.152)       | 0.171<br>(0.156)       | 0.0512<br>(0.171)     | 0.174<br>(0.153)       | 0.0551<br>(0.115)          |
| Yes, Yes                                   |                       | 0.130<br>(0.151)       | 0.160<br>(0.158)       | 0.0546<br>(0.185)     | 0.133<br>(0.151)       | 0.0771<br>(0.113)          |
| Mother stop working x Father stop working  |                       |                        |                        |                       |                        |                            |
| No, Yes                                    |                       | 0.0475<br>(0.178)      | -0.0168<br>(0.182)     | -0.0327<br>(0.246)    | 0.0516<br>(0.179)      | 0.0607<br>(0.137)          |
| Yes, No                                    |                       | 0.0423<br>(0.163)      | 0.00801<br>(0.171)     | 0.191<br>(0.201)      | 0.0308<br>(0.164)      | -0.0190<br>(0.121)         |
| Yes, Yes                                   |                       | -0.0243<br>(0.223)     | 0.0170<br>(0.232)      | 0.102<br>(0.268)      | -0.0257<br>(0.225)     | -0.0500<br>(0.171)         |
| Mother switched to smart working           |                       | -0.0857<br>(0.171)     | 0.0184<br>(0.178)      | 0.146<br>(0.294)      | -0.0987<br>(0.171)     | -0.0228<br>(0.127)         |
| Both parents under strict lockdown         |                       | 1.274**<br>(0.577)     | 1.241**<br>(0.615)     | 1.427**<br>(0.669)    | 1.316**<br>(0.572)     | 1.239**<br>(0.486)         |
| Survey respondent is male                  |                       | -0.408*<br>(0.230)     |                        | -0.140<br>(0.342)     | -0.359<br>(0.230)      | -0.351**<br>(0.171)        |
| Date of interview                          |                       | 0.0163<br>(0.0793)     | 0.0543<br>(0.0870)     | 0.0141<br>(0.123)     | 0.00521<br>(0.0794)    | 0.0158<br>(0.0589)         |
| Province FE                                | -                     | Yes                    | Yes                    | Yes                   | Yes                    | Yes                        |
| Day of week FE                             | -                     | Yes                    | Yes                    | Yes                   | Yes                    | Yes                        |
| Observations                               | 2,796                 | 2,578                  | 2,407                  | 2,563                 | 2,576                  | 2,626                      |
| R-squared <sup>2</sup>                     | 0.019                 | 0.316                  | 0.317                  | 0.299                 | 0.315                  | 0.0810                     |

\*\*\*  $p < 0.01$ , \*\*  $p < 0.05$ , \*  $p < 0.1$  ; Robust standard errors in brackets (clustered at household level)

Notes: 1. The constant is not reported for ordered logit estimation as it is separate for each level of the dependent variable. For the same reason, for each explanatory variable the table reports the coefficient, not the marginal effects.

2. For ordered logit estimation, the pseudo R-squared is reported.
